# Supplementary material for: Ketone Body β‐Hydroxybutyrate Prevents Myocardial Oxidative Stress in Septic Cardiomyopathy
Source: Hindawi journal article supplement (doi:10.1155/2022/2513837), 2022-01-01
Supplement: f1 [file 2513837.f1.pdf]

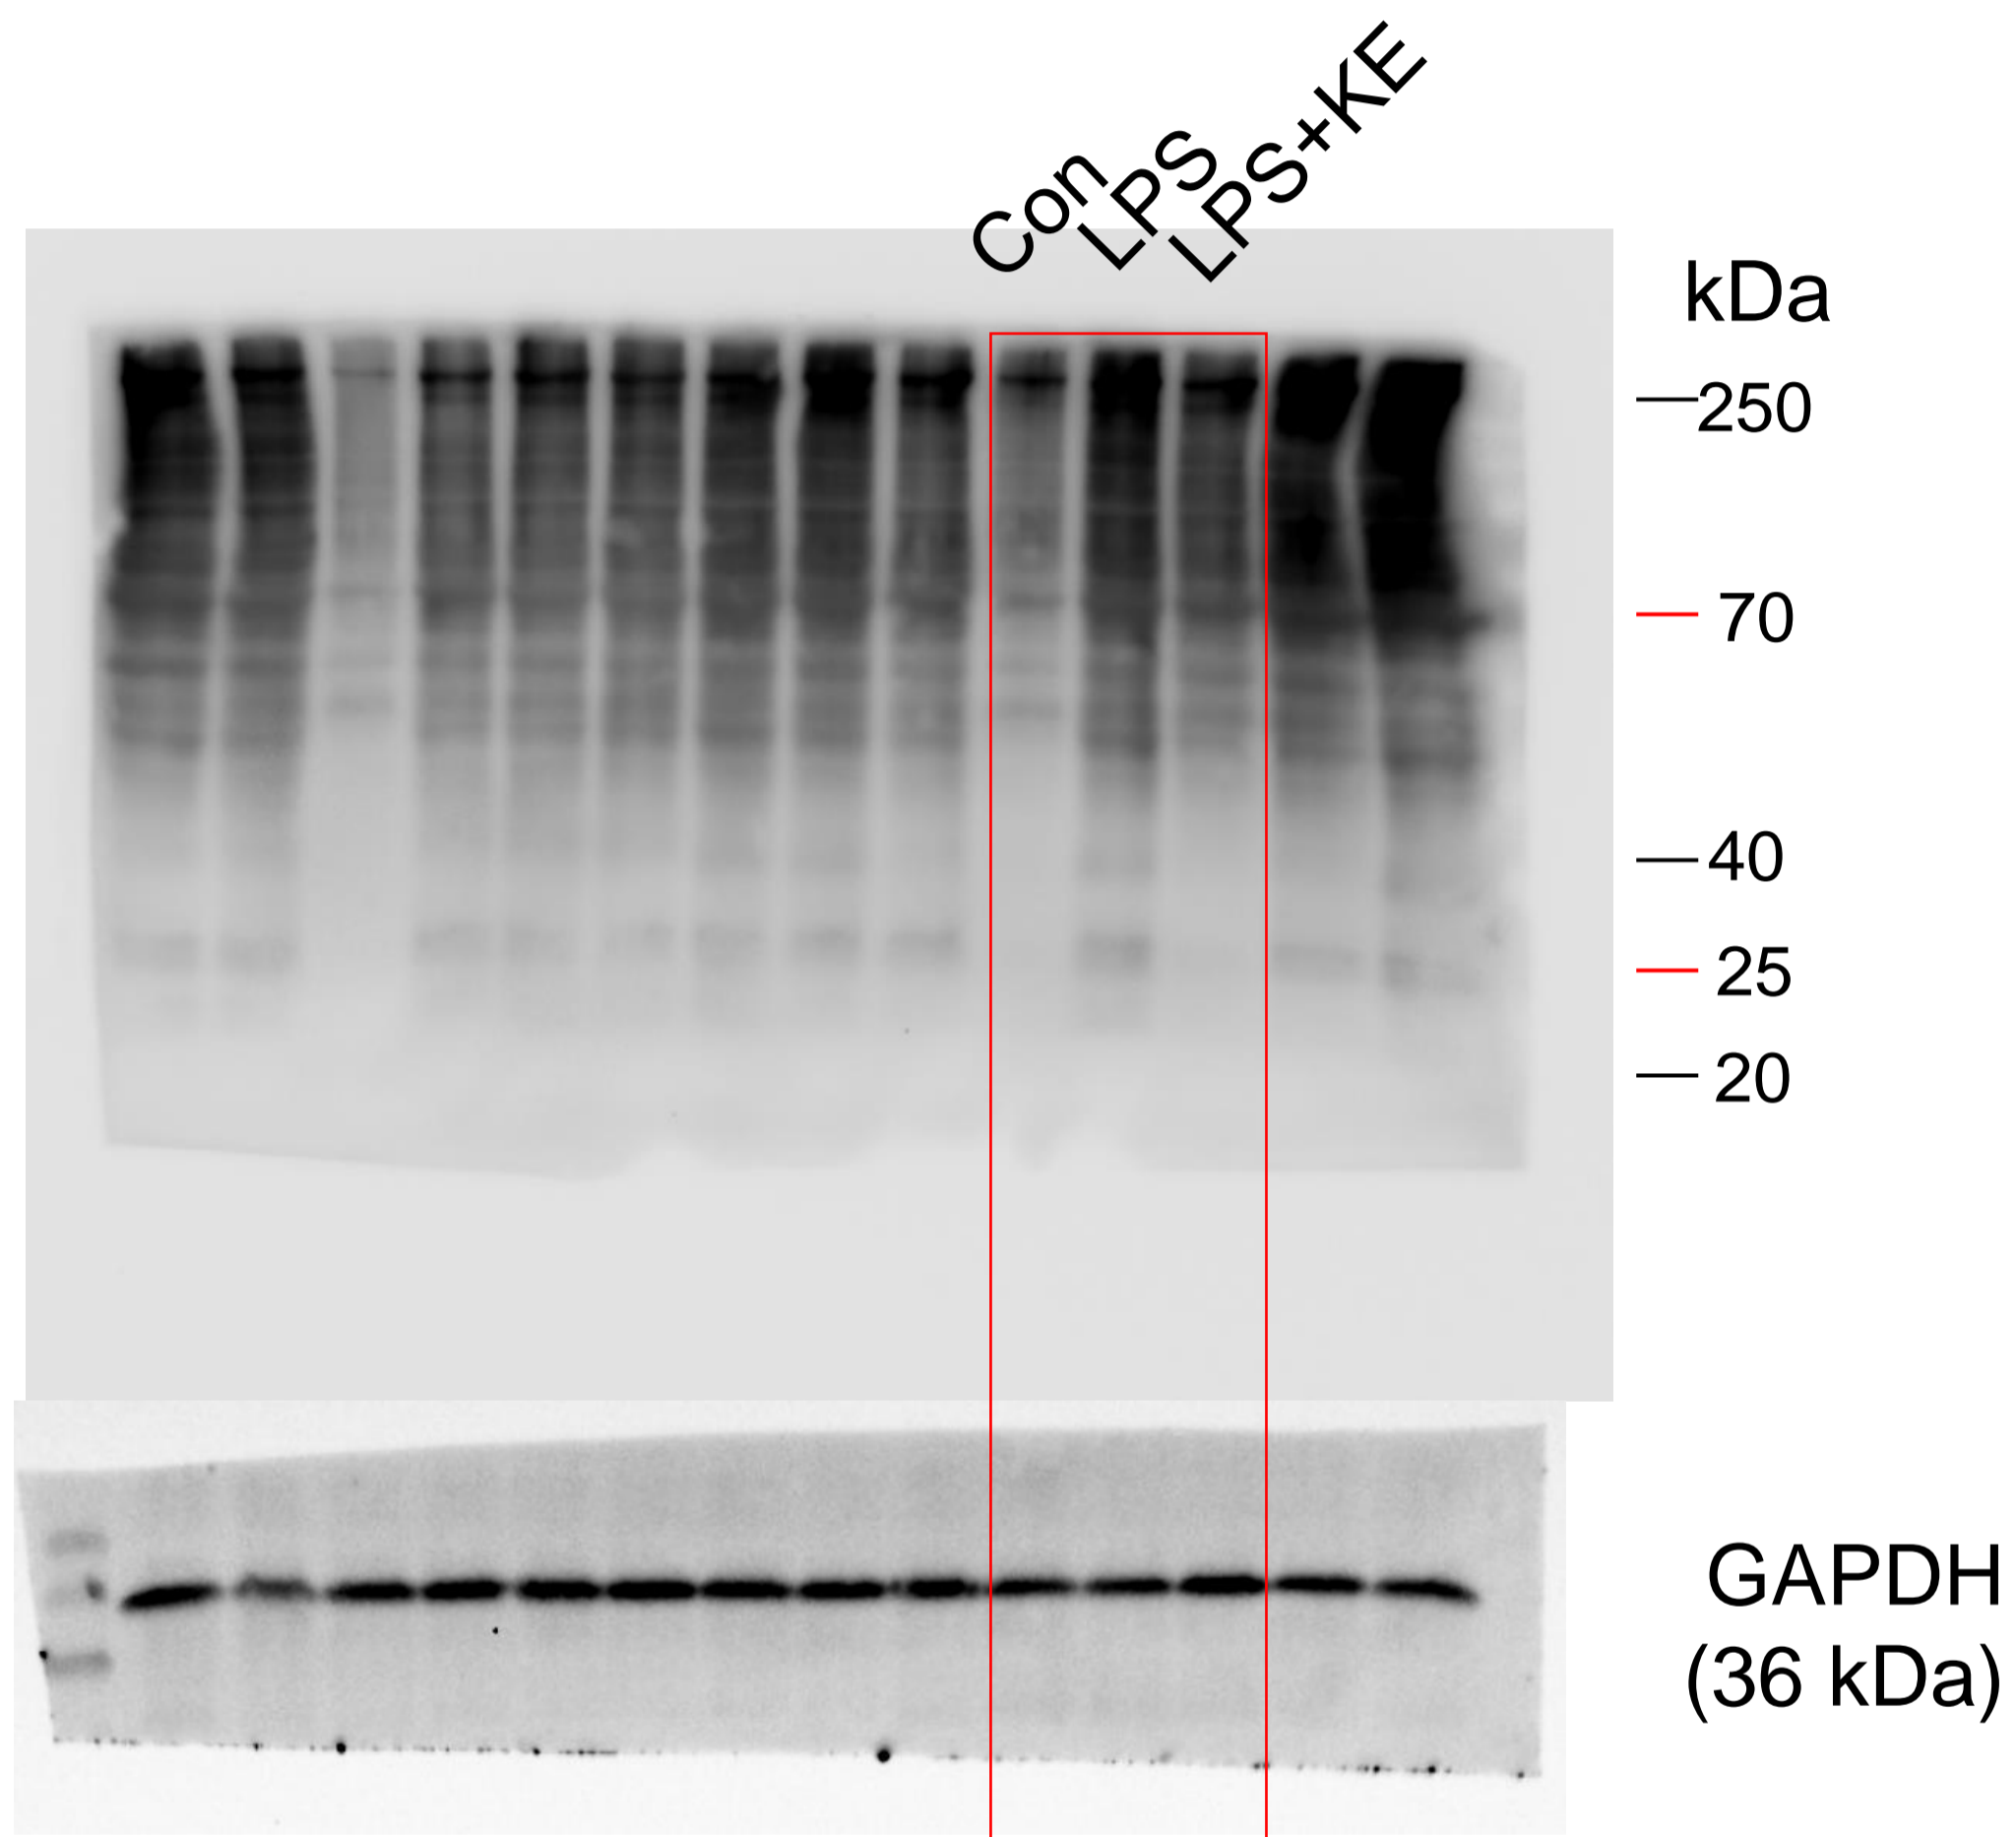

Full unedited gel for Figure 2F  
Acquired with ChemiDoc (BioRad)

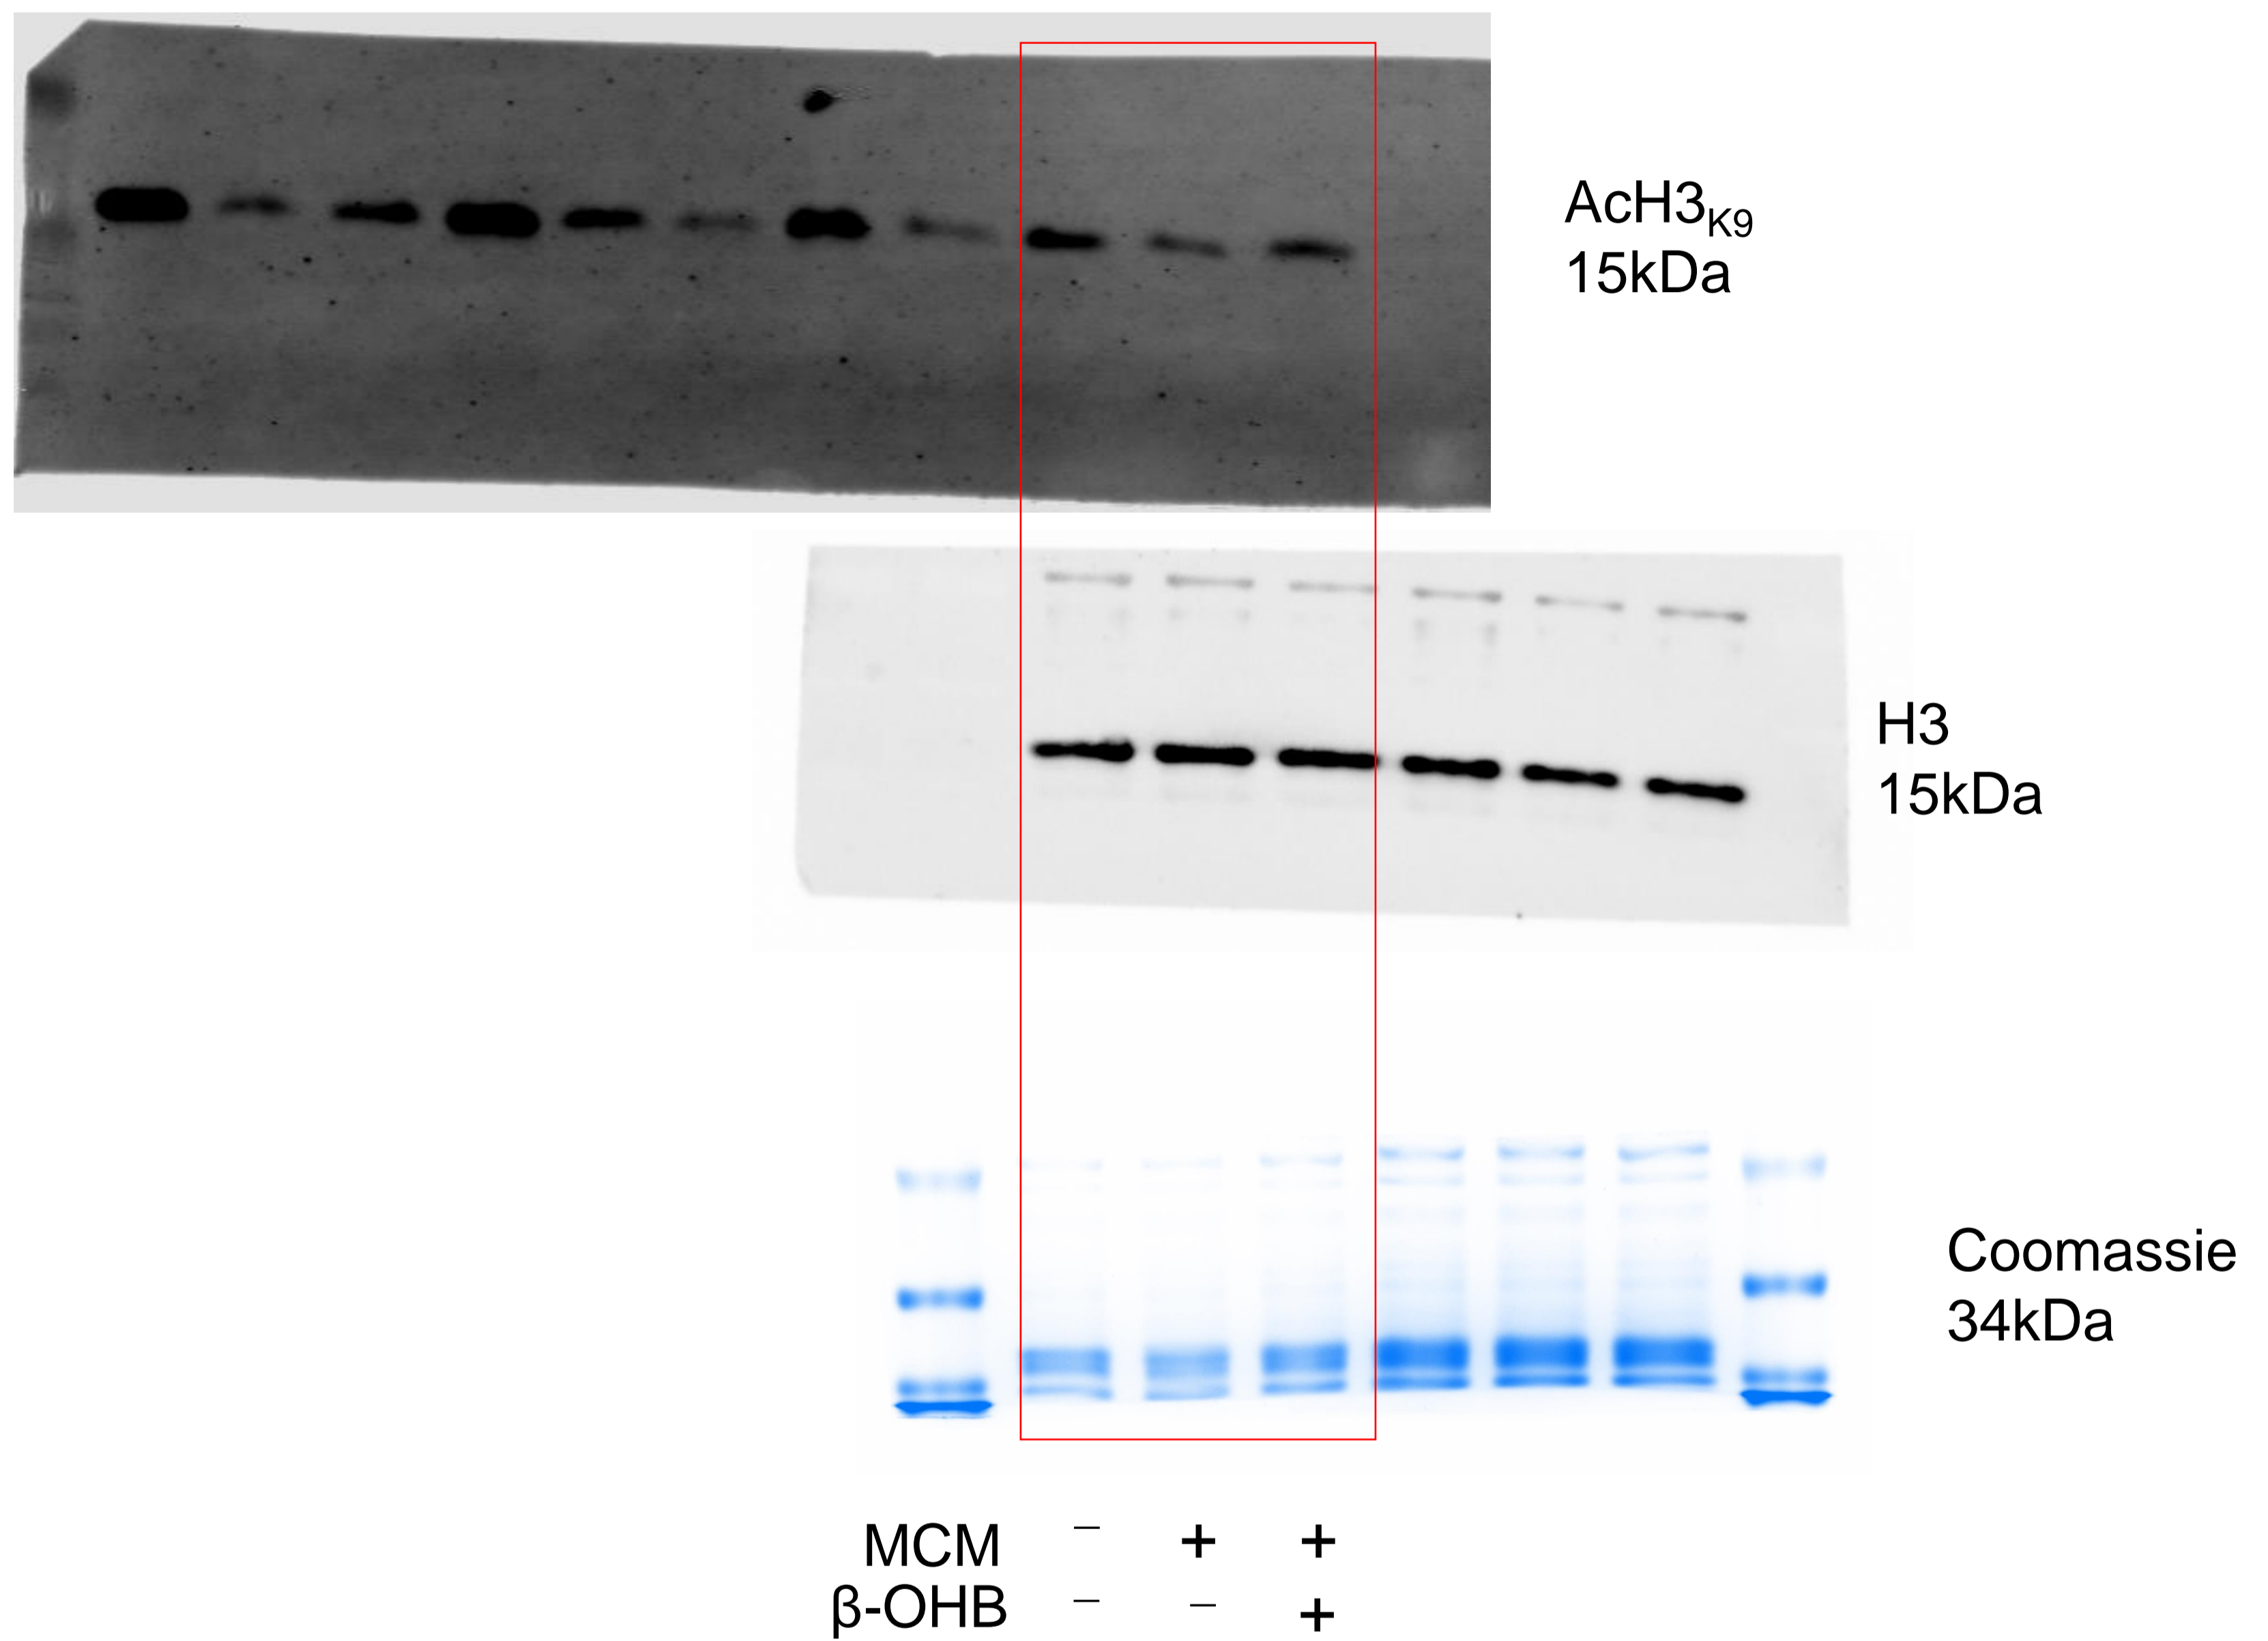

Full unedited gel for Figure 5D  
Acquired with ChemiDoc (BioRad)

H9C2 cells

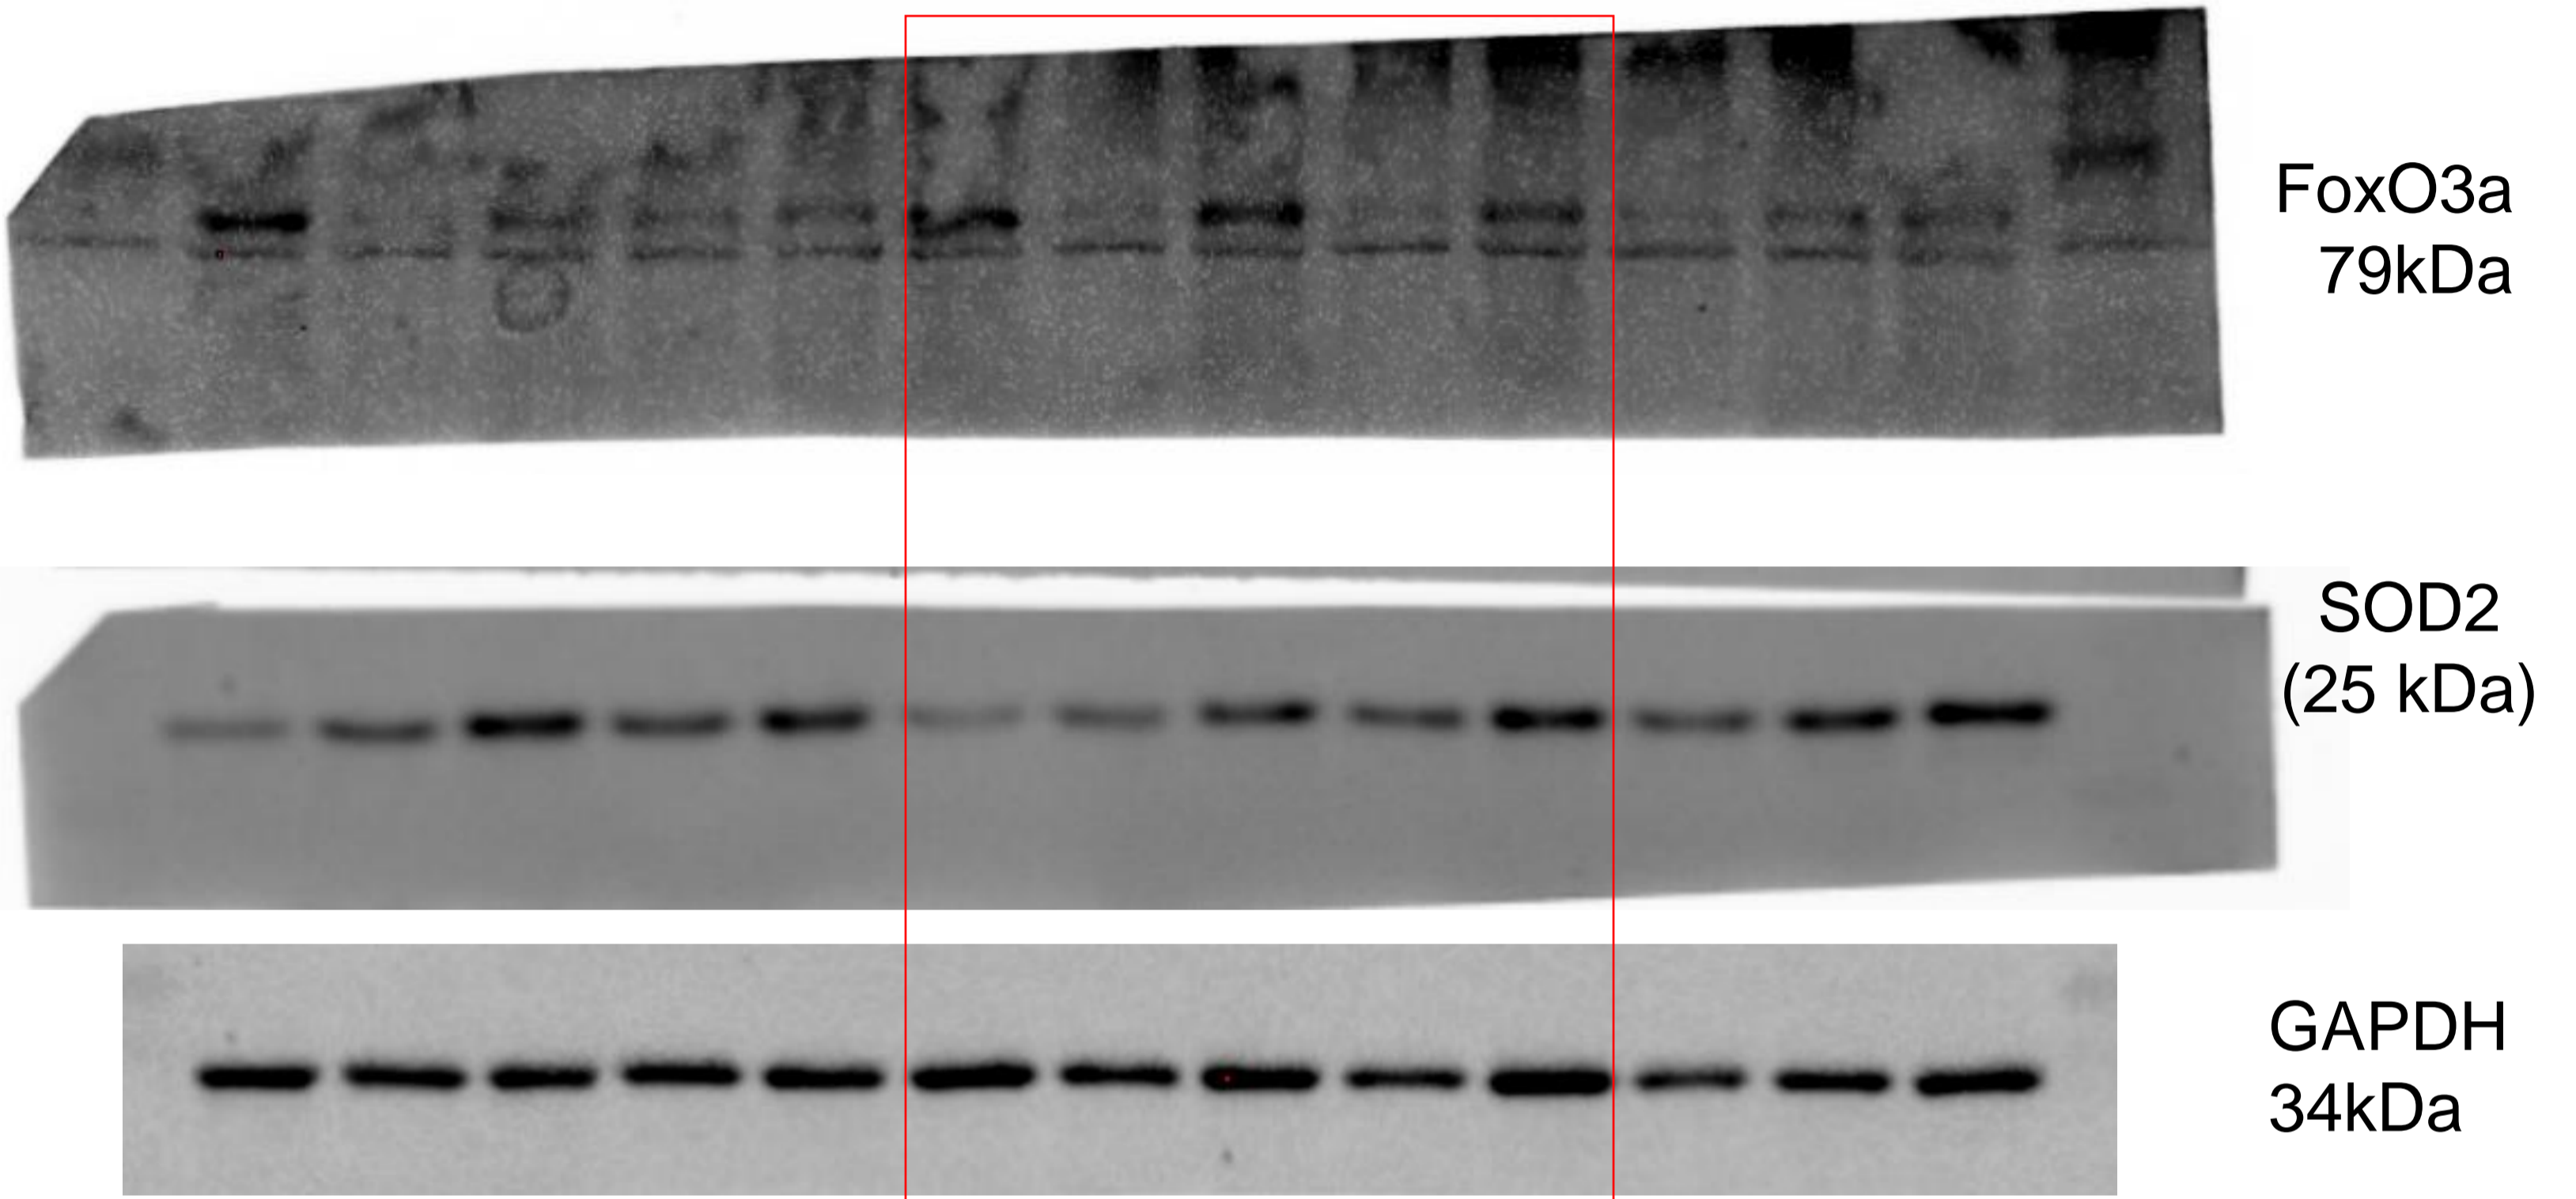

|              |   |   |   |   |   |
|--------------|---|---|---|---|---|
| MCM          | — | + | + | + | + |
| $\beta$ -OHB | — | — | + | + | + |
| ITSA1        | — | — | — | + | — |
| Entinostat   | — | — | — | — | + |

Full unedited gel for Figure 5G  
Acquired with ChemiDoc (BioRad)

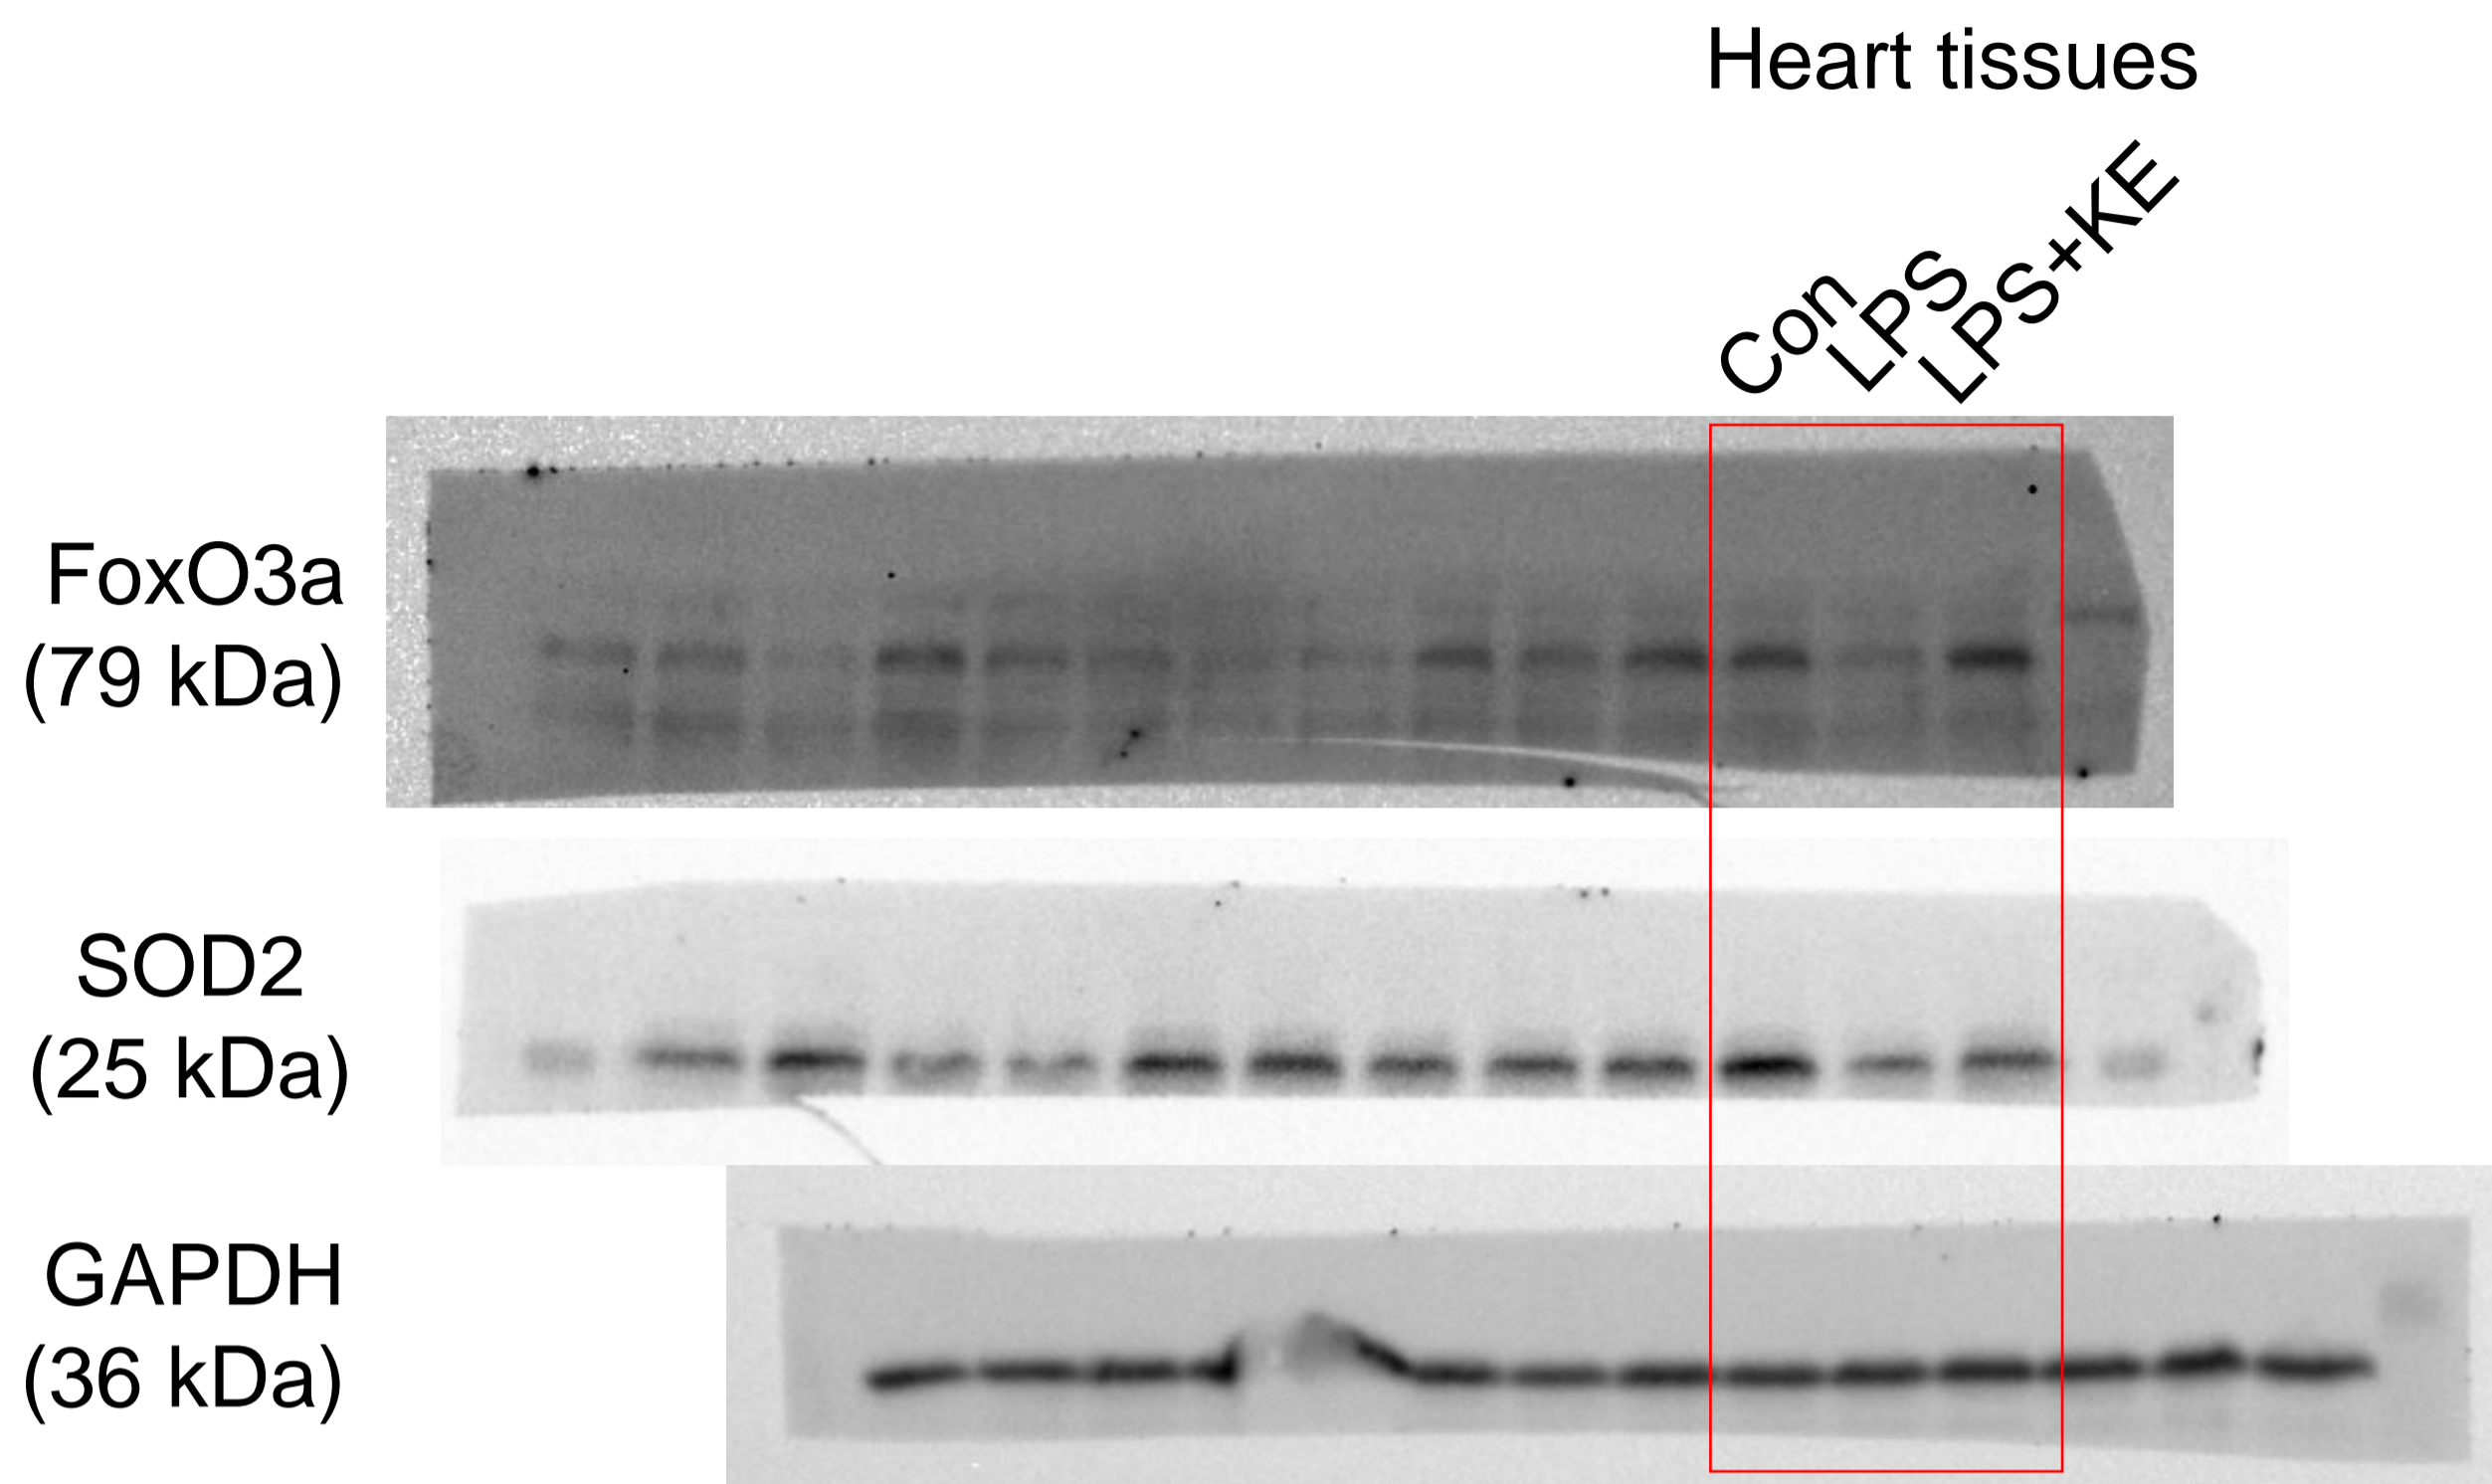

Full unedited gel for Figure 5J  
Acquired with ChemiDoc (BioRad)
